# Supplementary material for: Two Novel Human Anti-cd25 Antibodies With Antitumor Activity Inversely Related to Its Affinity and in Vitro Activity
Source: Research Square preprint supplement (doi:10.21203/rs.3.rs-277192/v1), 2021-03-12
Supplement: Supplementary file 1 [file 2bc1388e1ad1bcdcdd8cd911.docx]

Supplementary Materials for
**Two novel human anti-CD25 antibodies with antitumor activity inversely related to its affinity and *in vitro* activity**

Deyong Song1,+, Xiu Liu1,+, Chuangchuang Dong1, Chunjie Sha2, Zhenfei Ning1, Qiaoping Wang1, Jing Han1, Hong Liu1, Hongguang Xu1, Huimin Zhang1, Pingping Xing1, Mengqi Zong1, Ying Li1, Guangsheng Liu1, Xin Shao2, Changlin Dou1,*

1 Antibody Research and Development Center, Shandong Boan Biotechnology Co., Ltd., Yantai 264670, China. 2 State Key Laboratory of Long-acting and Targeting Drug Delivery System, Shandong Luye Pharmaceutical Co. Ltd, Yantai 264670, P.R. China

*Corresponding author. e-mail: DouChanglin@luye.com (C.D.)

+These authors contributed equally to this work.

**This PDF file includes:**

Methods
Supplementary Fig. 1 to Fig. 6
Supplementary Table 1 to 3

**Methods**

**Syngeneic mouse models**

These experiments were carried out at Beijing Biocytogen Co.,Ltd in compliance with the Guide for Care and Use of Laboratory Animals and Institutional Animal Care and Use Committee (IACUC) guidelines. The Approval Number is BAP-BJ-PS-102-19K007, BAP-BJ-PS-102-20B001 and BAP-BJ-PS-102-20G001 for three different experiments, respectively. B-hIL2RA humanized mice (Biocytogen), female, 6- to 8-week-old, were used for all tumor models. Commercialized antibodies were used to detect the percentage of immune cells by FACS.

For early phase of tumor development, mice were randomized into three groups, with 8 mice per group based on their body weight at day -1(the day before tumor inoculation). Then BA9 and BT942 were dosed at 10 mg/kg intraperitoneally twice a week with vehicle group as the control. 5×105 MC38 cells in PBS were inoculated subcutaneously in the flank of mice at the next day (day 0). On day 16, three mice in each group were sacrificed to test the proportion of CD45+ T, CD3+T, CD4+T, CD8+T, CD25+Foxp3+, Foxp3+(Treg) cells in tumor by FACS. Tumor size was measured twice a week by caliper, and animals were euthanized by CO2 asphyxiation when the mean tumor volume reached about 1300 mm3(day 21).

For late phase of tumor development, B-hIL2RA humanized mice were implanted with 5×105 cells MC38 cells subcutaneously in the flank (day 0). Mice were distributed into three groups (n=8) with group mean starting volumes of 50 to 60 mm3 (day 5), such that all groups had matched starting volume mean and range. Then BA9 and BT942 were also dosed at 10 mg/kg intraperitoneally twice a week with vehicle group as the control. Tumor size was measured twice a week by caliper, and animals were euthanized by CO2 asphyxiation when the mean tumor volume reached about 2000 mm3 (day 19). On day 19, four mice in each group were sacrificed to test the proportion of CD45+ T, CD3+T, CD4+T, CD8+T, CD25+Foxp3+, Foxp3+(Treg) cells in tumor and peripheral blood by FACS.

For the synergistic effect of BT942 and anti-mouse PD1 antibody at late phase of tumor development, B-hIL2RA humanized mice were implanted with 5×105 MC38 cells subcutaneously in the flank (day 0). Mice were distributed into four groups with 5 mice per group and treated with BT942, anti-mouse PD1 (BioXCell), their combination or vehicle when mean tumor volumes reached 50 to 60 mm3 at day 4. Tumor size was measured twice a week by caliper, and animals were euthanized by CO2 asphyxiation when mean tumor volume reached about 2000 mm3 (day 19).

Tumor volumes were calculated as volume = (w2×l)/2 where w is the tumor width and l is the tumor length in millimeters.

**phage** display

**screening**

**sequencing**

VH

CH

VL

CL

**Antibody**

**expression**


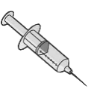

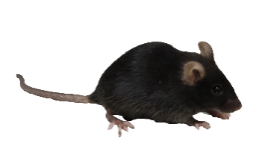


**In vitro** assay

**In vivo** assay

**Human antibody**

**transgenic mice**

**Supplementary Figure S1.** The candidate antibodies were obtained by phage display screening. There were 14 clones that do not block IL-2 binding to CD25 in 134 binding positive clones. Combined with other in vitro data such as ADCC and FACS, we have identified candidate antibodies for in vivo experiments.

**Supplementary Figure S2.** Cross-reactivity with mouse CD25 by BA9 and BT942. Antibody was loaded onto the sensor, then serial dilutions of CD25 was injected. BA9 and BT942 cannot react with mouse CD25. Experiments were performed in triplicate.

**Supplementary Figure S3.** ADCC by reporter bioassay. The target cells were activated CD8+T cells or inactivated CD8+T cells, the effector cells were Jurkat cells from Promega. Experiments were performed in duplicate.

**a**

**c**

**b**

**e**

**f**

**d**

**Supplementary Figure S4.** Quantification of CD45+, CD3+, CD4+ T population percentage in tumor cells from early and late phase treatment. p values obtained by Dunnett-t test (two-tailed). Compared with BA9, there was a bigger increase in CD45+, CD3+, CD4+ T percentage for BT942. Data were presented as Mean ± SEM.

**c**

**b**

**a**

**f**

**e**

**d**

**Supplementary Figure S5.** Quantification of CD45+, CD4+, CD3+, CD8+, Foxp3+ (Treg) and hCD25+Foxp3+ population percentage in peripheral blood cells from late phase treatment. p values obtained by Dunnett-t test (two-tailed). Data were presented as Mean ± SEM.

**Effector T cells**

**Treg cells**

**Effector T cells**

**Treg cells**

**Inhibitory tumor microenvironment**

**Effector T cells**

**Treg cells**

**BT942**

**a better candidate**

**BA9**

**Supplementary Figure S6.** Possible mechanism of BT942 as a better candidate. Remove the inhibition for T cells by deleting Tregs with high CD25 expression promotes the increase of effector T cells (Teff) while weakly killing Teff cells with low CD25 expression, which makes BT942 have a stronger ability to expand Teff cells than BA9 in the tumor microenvironment.

**Supplementary Table S1.** Mice, cell lines and reagents

| **REAGENT** | **IDENTIFIER** | **SOURCE** |
| --- | --- | --- |
| Human antibody transgenic mice | - | Shandong Boan Biotechnology |
| B-hIL2RA humanized mice | - | Biocytogen |
| Cynomolgus monkeys | - | Junke Zhengyuan (Beijing) Pharmaceutical Research |
| CD25/IL2RA Protein, Human, Recombinant (His Tag) | 10165-H08H | Sino Biological |
| Transcriptor First Strang cDNA Synthesis Kit | 4897030001 | Roche |
| SfiI | R0123L | New England Biolabs |
| TG1 competent cells | 60502-2 | Lucigen |
| PEG8000 | A600433-0500 | BBI Life Sciences |
| NaCl | 10019318 | Sinopharm |
| Dynabeads M-280 Streptavidin | 11206D | Invitrogen |
| Ez-link Sulfo-NHS-LC-Biotin | 21335 | Thermo Fisher Scientific |
| Stripwell Microplate | 42592 | Costar |
| High binding plates | 40301 | Beaver |
| Skim milk powder | 232100 | BD Biosciences |
| PBS | P1010 | Solarbio |
| Tween-20 | T8220 | Solarbio |
| Affinity purified antibody peroxidase Labeled Goat anti-human IgG(H+L) | 474-1006 | KPL |
| Streptavidin/HRP | 890803 | R&D Systems |
| FITC-anti human IgG Fc mAb | 409310 | Biolegend |
| CM5 chip | BR-1005-30 | GE healthcare |
| HBS-EP+ buffer | BR-1006-69 | GE healthcare |
| Human antibody capture kit | 29-2346-00 | GE healthcare |
| SA biosensors | 18-5019 | ForteBio |
| Expi-CHO Expression system | A29133 | Gibco |
| AT Protein A Diamond | AA0272 | Bestchrom |
| Jurkat | G7011 | Promega |
| SU-DHL-1 | CRL-2955 | ATCC |
| HEK293T-CD25 | - | KYinno |
| PBMC | PB003F-C | ALLCELLS |
| CD8+T cell | PB009-3-C | ALLCELLS |
| Bio-Glo Luciferase Assay Buffer/Substrate | G7940 | Promega |
| Anti-mouse PD1 antibody | BE0146 | Bio X cell |
| Zombie NIR™ Fixable Viability Kit(DMSO) | 423106 | Biolegend |
| Anti-mouse CD16/32 | 101302 | Biolegend |
| Solarbio PBS buffer | P1020 | Solarbio |
| Tumor Dissociation Kit,mouse | 130-096-730 | Miltenyi Biotec |
| Brilliant Violet 510™ anti-mouse CD45 | 103138 | Biolegend |
| Alexa Flour® 488 anti-mouse CD3 | 100210 | Biolegend |
| Brilliant Violet 421™ anti-mouse CD4 | 100438 | Biolegend |
| Brilliant Violet 711™ anti-mouse CD8a | 100748 | Biolegend |
| APC anti-human CD25 | 302610 | Biolegend |
| PE/Cy™ 7 anti-mouse/rat Foxp3 | 25-5773-82 | eBioscience |

**Supplementary Table S2.** The average tumor volume ± SEM and The Tumor Growth Inhibition value per group.

| **Sample** | **Tumor volume(mm3) AVG±SEM** | **TGI(%)** |
| --- | --- | --- |
| Vehicle | 2619±304 | - |
| mPD-1 | 2029±622 | 23.1 |
| BT942 | 1143±186 | 57.9 |
| BT942+mPD-1 | 717±260 | 74.5 |

**Supplementary Table S3.**  PK parameters of single intravenous administration of BT942 at cynomolgus monkeys (n=2).

| **Parameter** | **Unit** | **BT942** |
| --- | --- | --- |
| T1/2 | h | 206.97±19.03 |
| Tmax | h | 0.13±0.16 |
| Cmax | μg/mL | 316.51±17.48 |
| C0 | μg/mL | 316.23±17.06 |
| AUC(0-t) | h*μg/mL | 32036.89±1234.97 |
| AUC(0-∞) | h*μg/mL | 38548.79±1874.86 |
| Vz/F | mL/kg | 77.38±3.36 |
| CLz/F | mL/h/kg | 0.26±0.01 |
| MRT(0-t) | h | 273.18±6.83 |
